# Supplementary material
Source: PubMed Central journal article supplement (PMC5462054)
Supplement: supp_pp.17.00615_PP2017-RA-00615DR1_Supplemental_Figures.pdf [file supp_pp.17.00615_PP2017-RA-00615DR1_Supplemental_Figures.pdf]

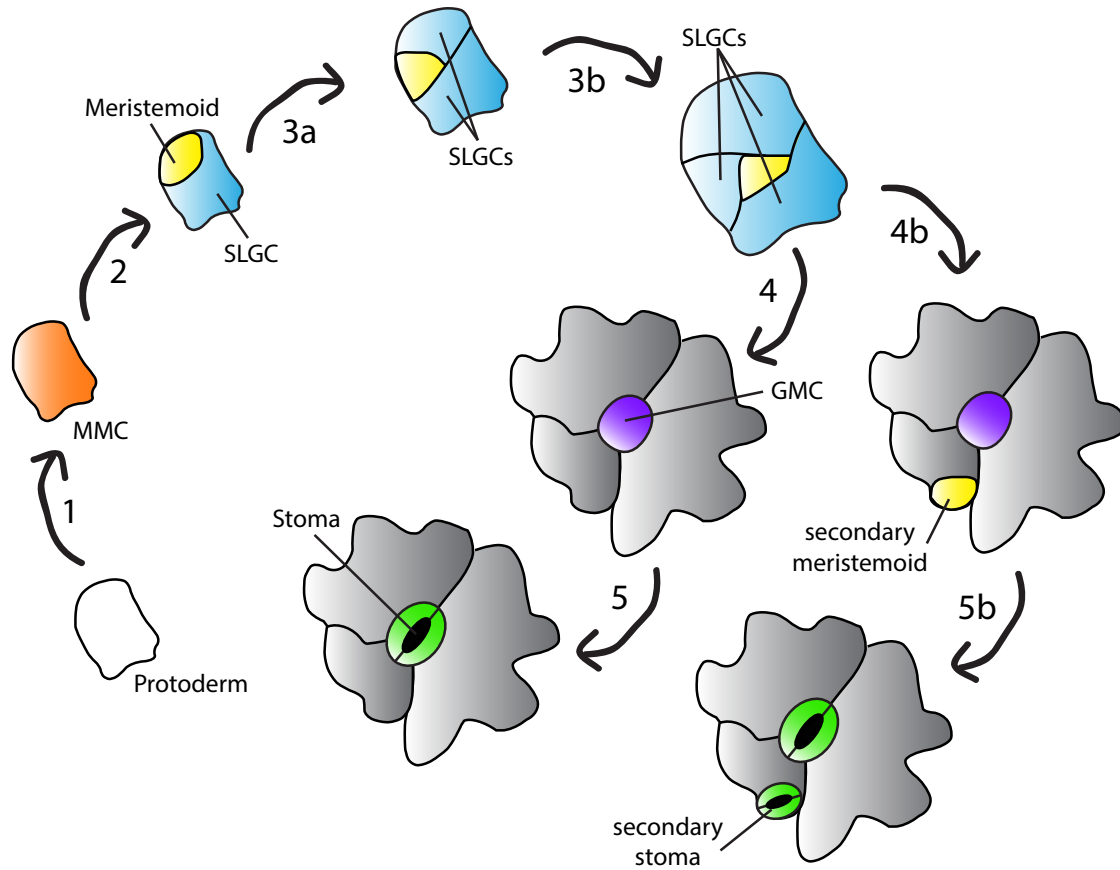

**Supplemental Figure 1.** Stomatal development in *Arabidopsis*.

Developmental steps that lead to stomata formation. A protodermal cell acquires MMC fate (orange). The MMC executes the first asymmetric division that generates a meristemoid (yellow) and an SLGC (blue). The meristemoid can undergo additional asymmetric divisions, amplifying the number of SLGCs, and ultimately it differentiates into a GMC (purple), of which the symmetric division produces the guard cell (GC) pair that constitutes the stoma (green). Secondary or satellite stomata can be formed when a SLGC asymmetrically divides away from the primary stoma.

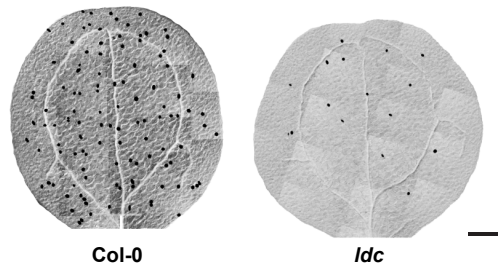

**Supplemental Figure 2.** Adaxial cotyledon phenotype exhibited by the *ldc* mutant.

DIC images showing complete 15-day-old adaxial cotyledons of Col-0 and *ldc*. Bar = 0.5 mm.

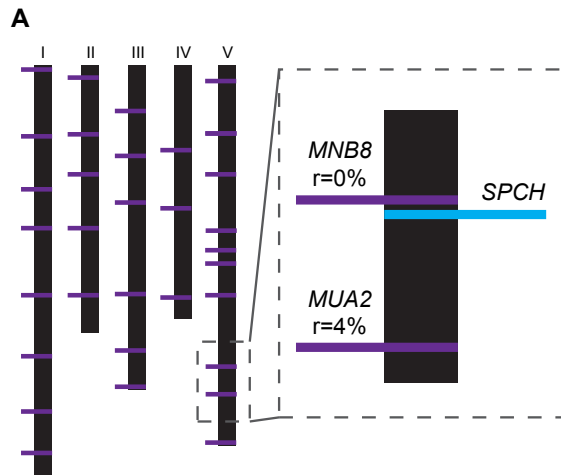

**B**

**SPCH (At5g53210) aminoacid sequence**

MQEIIPDFLEECEFDVDSL~~AGDDL~~FAILESLEGAGEISPTAAST

PKDGTSSKELVKDQDYENSSPKRKKQRLETRKEEDEEEED

GDGEAEEDNKQDGQK~~MSHVTVERN~~~~R~~RKQMNEHLTVLRSL  
\* \* \*

**bHLH**  
MPCFYVVRGDKQASIGGVVEYISELQQVLQSLEAKKQRKTYA

**EVLS**PRVVPSPRPSPPVLSPRKPPLSPRINHHQIHHHLLPPIS

**MPKTD**  
PRTPQPTSPYRAIPPQLPLIPQPPLRSYSSSLASCSSLDGPPPY

**SP**ASSSSSPSVSSNHESSVINELVANSKSA~~LADVE~~~~V~~KFSGAN  
V→M (*spch-2*)

**SMF**  
VLLKTVSHKIPGQVMKIIAAEDLALEILQVNINTVDETMLNSFT

**IKIGIECQLSAEELAQ**~~Q~~IQQTFC  
Q→stop (*spch-1*)

**Supplemental Figure 3.** Genetic mapping of the *ldc* mutation and SPCH protein sequence indicating known domains and amino acid changes of the point mutants.

(A) Genetic map of *Arabidopsis* presenting the 32 microsatellite markers (purple lines) used for the genetic mapping of the *ldc* mutation. Each black rectangle represents a chromosome (I to V). Inset shows the genome region in which the *ldc* mutation had reduced recombination rates (r) and the physical position of the SPCH locus (blue line). (B) SPCH amino acid sequence with colored domains (blue for bHLH, yellow for MAP KINASE TARGET DOMAIN [MPKTD], and green for the plant specific C-terminal domain (SPCH, MUTE and FAMA) [SMF]) and point amino acid changes for the different mutants (red).

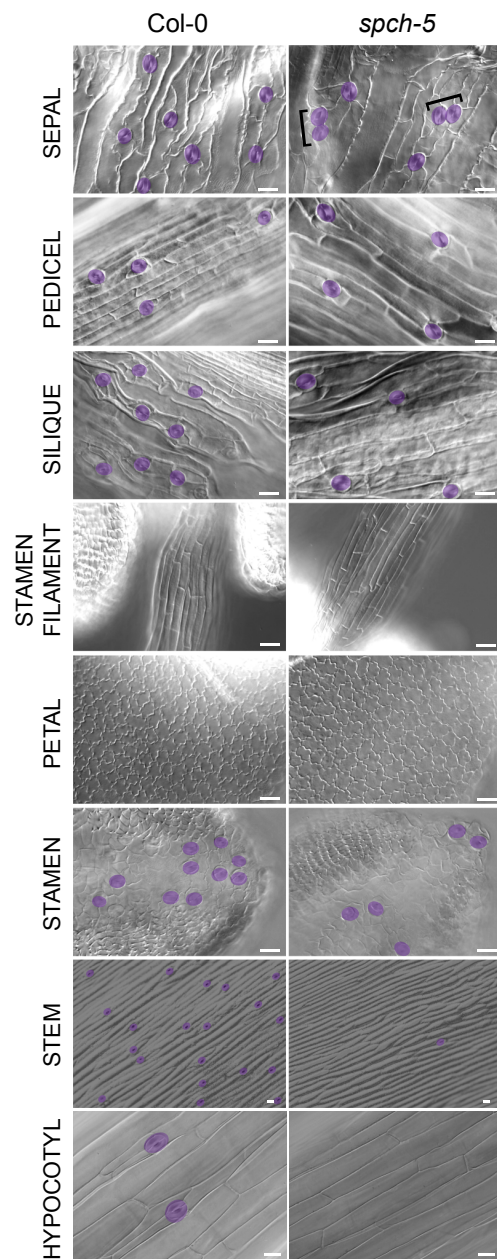

**Supplemental Figure 4.** Epidermal DIC images of several mature organs in Col-0 and *spch-5*.

Stomata are false-colored in purple for better identification. Brackets mark stomatal clusters. Bars = 20  $\mu$ m.



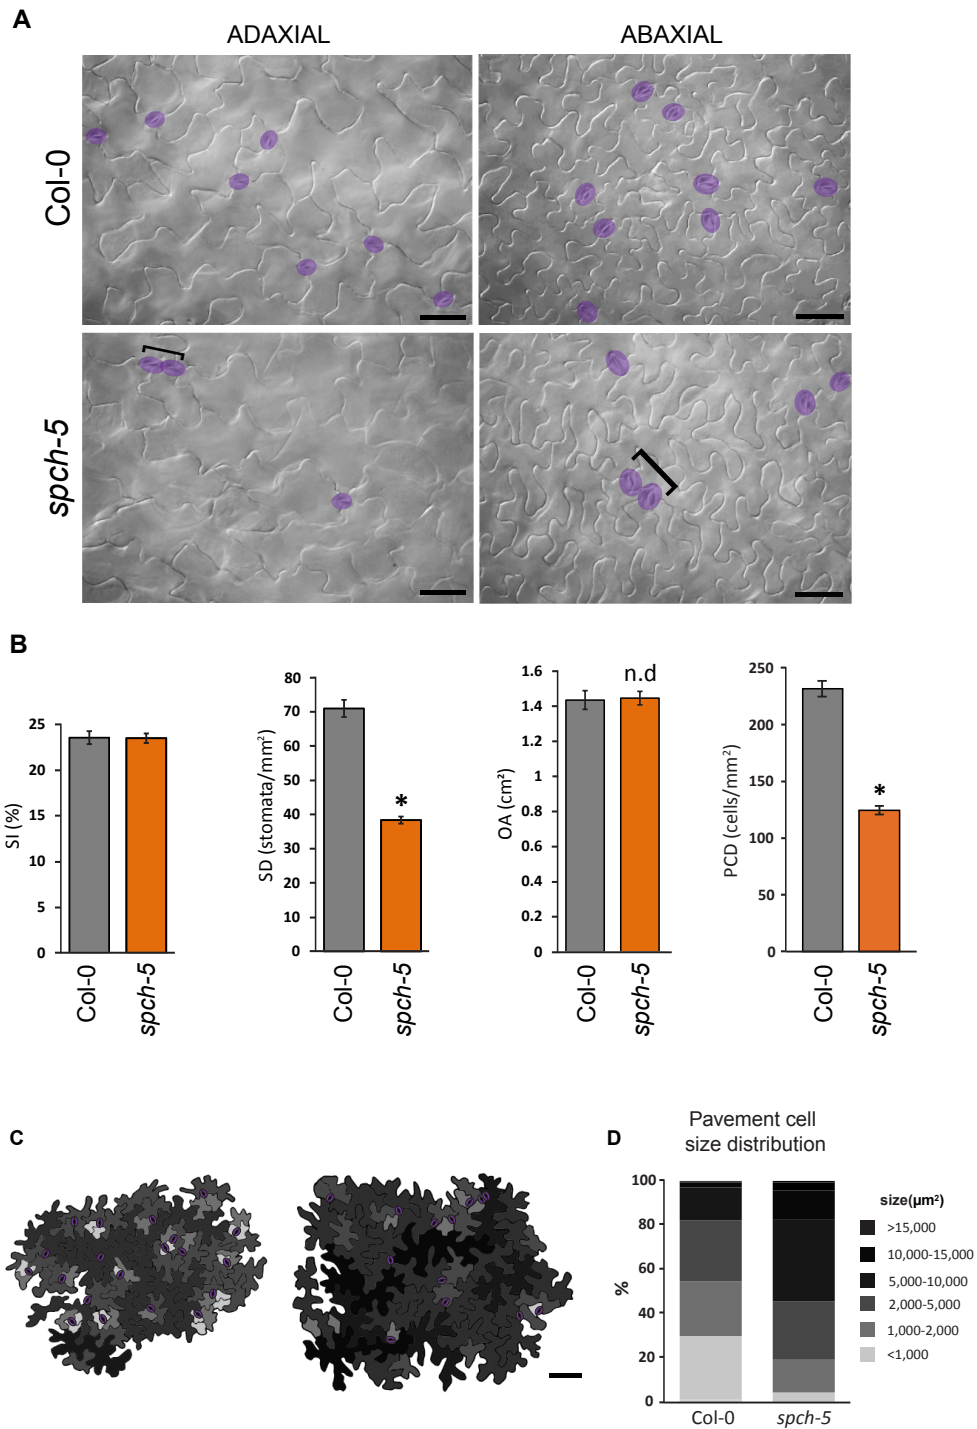

**Supplemental Figure 5.** *spch-5* third-leaf epidermal phenotype.

**(A)** DIC images of the adaxial and abaxial epidermis of Col-0 and *spch-5* in third leaves of 28-day-old plants. Stomata are highlighted in purple and clusters marked by brackets. Bars = 50  $\mu\text{m}$ . **(B)** Graphs representing stomatal index, stomatal density, organ area and pavement cell density in abaxial epidermis of 28-day-old third leaves. Grey and orange denote Col-0 and *spch-5*, respectively. Asterisks indicate  $P < 0.05$  (Student's  $t$  test;  $n = 10$ ) and n.d  $P > 0.05$ . Error bars represent SE. **(C)** Representative drawings of Col-0 and *spch-5* with color code as in **(D)**. Stomata are indicated in purple. **(D)** Size distribution of pavement cells in Col-0 and *spch-5*. Frequency of large pavement cells is much higher in the mutant than in the wild type. Bar = 100  $\mu\text{m}$ .

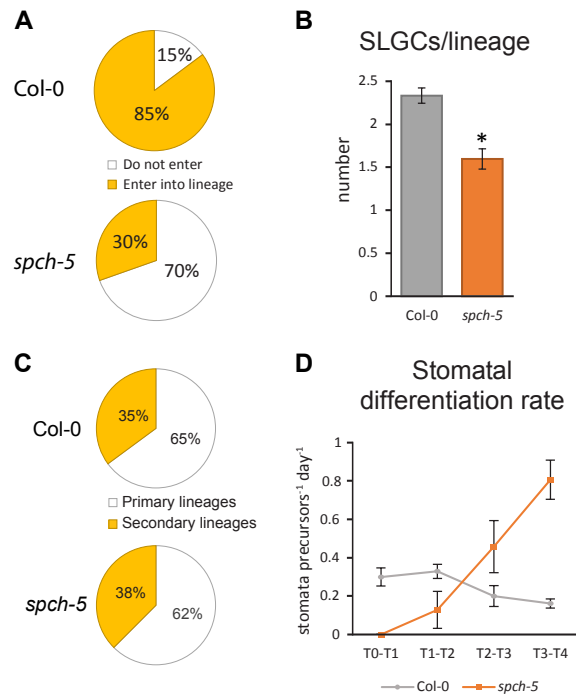

**Supplemental Figure 6.** Additional data derived from cell tracking of leaf primordia shown in Figure 2.

Graphs elaborated from leaves ( $n = 5$ ) per genotype and with 50 cells at initial field (T0). **(A)** Percentage of entry divisions. **(B)** Number of SLGCs per lineage. **(C)** Percentage of primary and secondary lineages. **(D)** Stomatal differentiation rate. Asterisk in **(B)** denotes  $P < 0.05$  (Student's  $t$  test). Error bars represent SE.

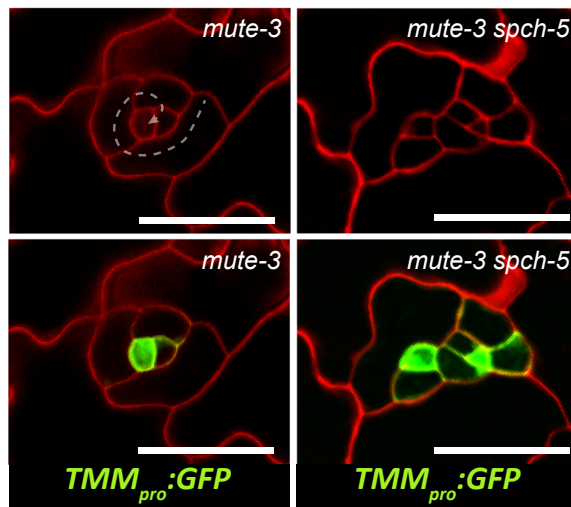

**Supplemental Figure 7.** Orientation of cell division planes in *spch-5* and *spch-5 mute-3* stomatal lineages.

Confocal images of 13-day-old adaxial cotyledon epidermis, showing cell contours with PI (red) and young lineage cells with GFP (green) expressed from a  $TMM_{pro}:GFP$  reporter construct. *mute-3* plants form rosette-like lineages with several small cells in a regular inward spiral arrangement indicated as a dotted white line. Only the most recently formed meristemoid shows a strong  $TMM_{pro}:GFP$  expression. *mute-3 spch-5* double mutant lineages also display extra small cells, but arranged in irregular patterns and of which several express  $TMM_{pro}:GFP$ . Note the absence of stomata due to the lack of the *MUTE* function. Bars = 50  $\mu$ m.

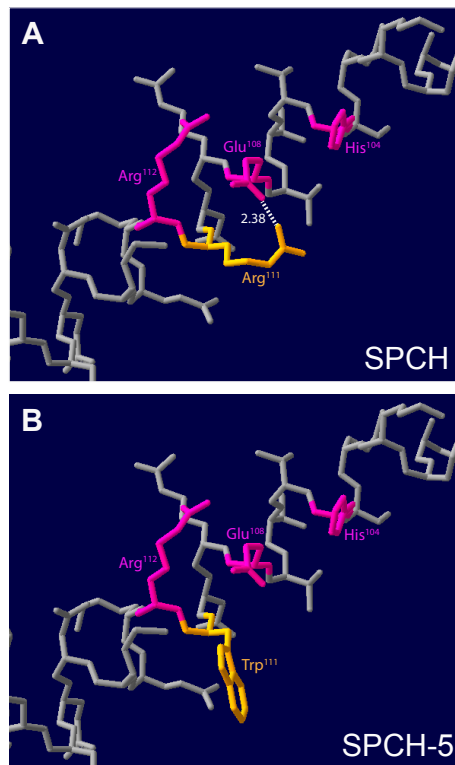

**Supplemental Figure 8.** Homology-based three-dimensional structural prediction for the SPCH-5 protein.

Modeled protein structures of SPCH versions. **(A)** Wild type SPCH. **(B)** SPCH-5 predicted from *spch-5*. The amino acid triad critical for DNA binding in other bHLH proteins is highlighted (pink). The wild-type Arg<sup>111</sup> substituted by Trp<sup>111</sup> in *spch-5* is marked in orange. The hydrogen bond involving this Arg<sup>111</sup> is indicated as a dashed line with the distance in Ångströms **(A)**, but is lost in the mutant **(B)**.

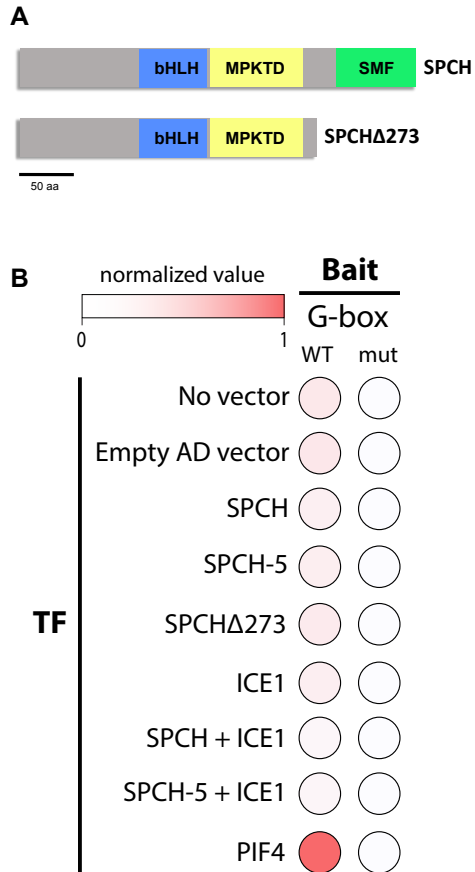

**Supplemental Figure 9.** DNA-protein interactions involving SPCH-5.

**(A)** Scheme of the domain structure of SPCH and the truncated SPCHΔ273 version lacking the C-terminal part (the ACT-like or SMF domain). **(B)** Yeast one-hybrid experiment with the tandem-repeated G-box sequence as bait for the wild type (WT) or a mutated version (mut). Colored circles indicate *LacZ* reporter-normalized expression.

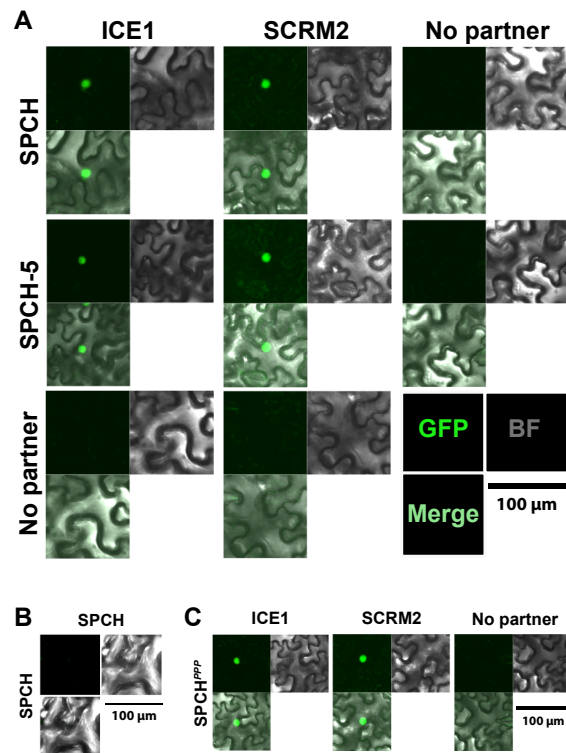

**Supplemental Figure 10.** Protein–protein interactions involving SPCH-5.

(A) to (C) BiFC experiments with transient expression assays in *Nicotiana benthamiana* leaves. Image compositions were made with representative cells showing the recomposed GFP signal diagnostic for physical interactions between proteins.

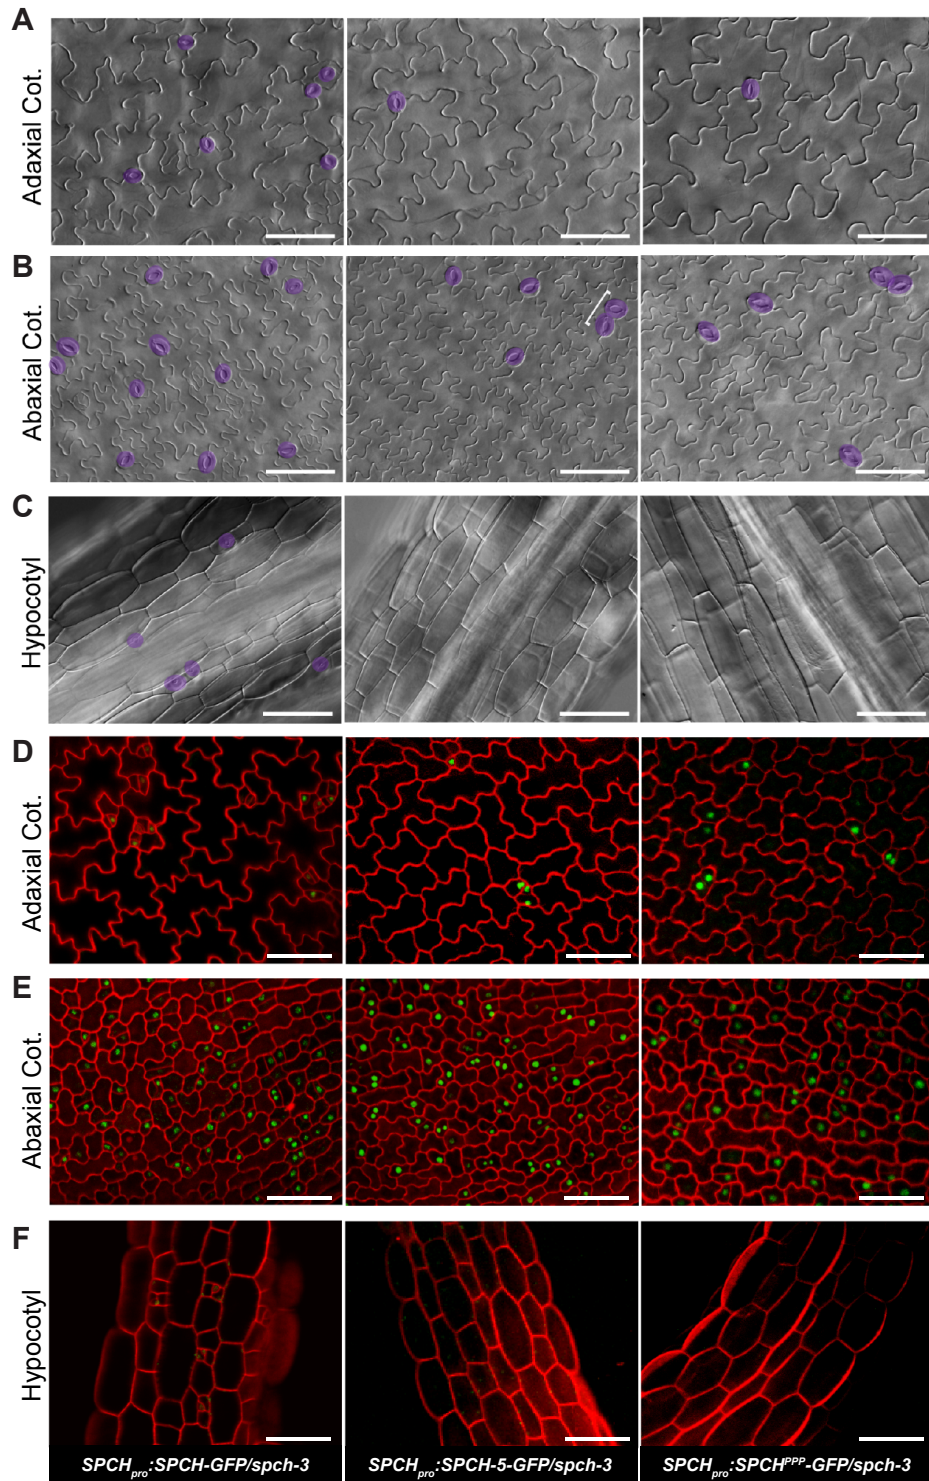

**Supplemental Figure 11.** Phenotypic and protein expression analyses of *spch-3* lines complemented with different SPCH versions.

(A) to (C) DIC images of the epidermis of *spch-3* plants transformed with translational GFP fusions to *SPCH*, *SPCH-5*, or *SPCH<sup>PPP</sup>* under the control of the *SPCH* promoter. Adaxial (A) and abaxial (B) 23-day-old cotyledons and 10-days-old hypocotyls (C) are shown. Stomata are colored purple. Stomatal clusters are enclosed into brackets. (D) to (F) Confocal images of the same lines in (A) to (C). Red outlines are PI-stained cell contours. Images were taken 3 days after sowing. GFP fluorescence marks the expression of the different protein versions. Adaxial (D) and abaxial (E) cotyledons and hypocotyls (F) are shown. Bars = 100  $\mu$ m.

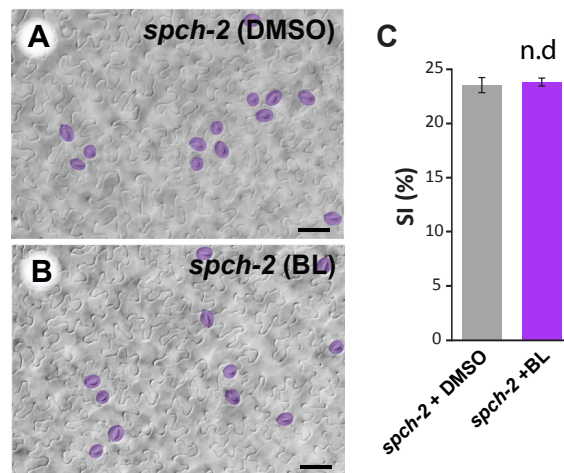

**Supplemental Figure 12.** BL effect on *spch-2* stomatal development.

(A) and (B) DIC images of the abaxial epidermis of *spch-2* in DMSO (A) and BL (B). (C) Stomatal index quantification of *spch-2* in medium with (purple) and without BL (grey). Error bars represent SE. n.d denotes absence of statistically significant differences between mean values (95% confident Student's *t* test).



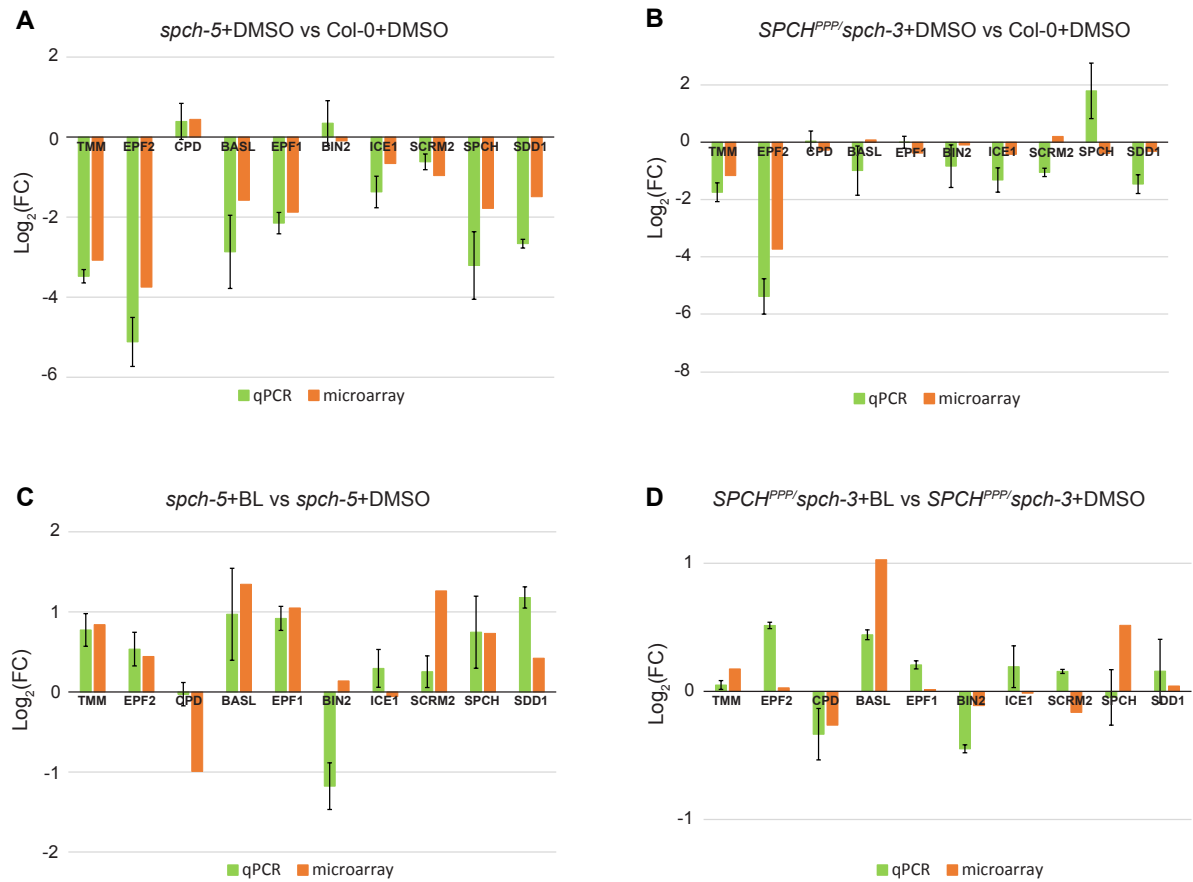

**Supplemental Figure 13.** Quantitative PCR for microarray validation.

Gene expression data in the microarrays (orange) validated by qRT-PCR (green) for 10 genes related to stomata development or BR pathway, selected in pairwise comparisons between genotypes and BL treatments. **(A)** Nontreated *spch-5* vs Col-0. **(B)** Nontreated *SPCH<sup>PPP</sup>/spch-3* vs Col-0. **(C)** BL-treated vs control *spch-5*. **(D)** BL-treated vs control *SPCH<sup>PPP</sup>/spch-3*. *UBIQUITIN10* and *ACTIN2* served as reference genes. The Log<sub>2</sub>-fold change of the qRT-PCR expression data was calculated and represented. The qRT-PCR results were averaged from three (or two in the case of *SPCH<sup>PPP</sup>/spch-3*) independent experiments, with the error bar representing the SE of the mean.

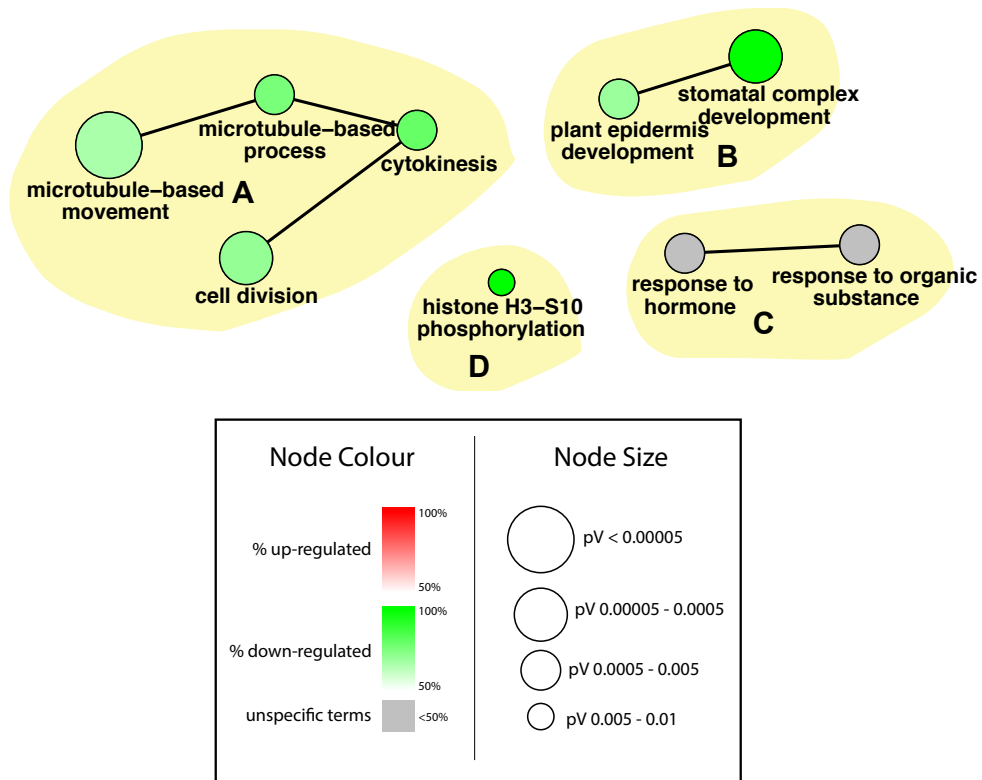

**Supplemental Figure 14.** Biological processes overrepresented in the *spch-5* DEGs.

Genes differentially expressed in *spch-5* as compared to Col-0 were analyzed with Gene Ontology (GO) term enrichment by means of ClueGO. Circles represent GO categories and lines depict relationships between nodes. Only the main categories enriched in DEGs in *spch-5* and the involved main nodes are shown. Nodes containing down-regulated genes are in green; nodes containing both up- and down-regulated genes are in grey; no nodes were found with only up-regulated genes. Node size is relative to its *P*-value (inset). **(A)** Cell division and expansion. **(B)** Stomatal and epidermal development. **(C)** Hormonal responses. **(D)** Histone kinases
